# Supplementary material for: Drought-Induced Xylem Sulfate Activates the ABA-Mediated Regulation of Sulfate Assimilation and Glutathione Redox in Brassica napus Leaves
Source: MDPI journal article supplement (doi:10.3390/metabo12121190), 2022-11-29
Supplement: s1 [file s1]

**Supplementary Table S1.** Specific primers used for qRT-PCR.

| Target gene | GenBank Number | Forward sequence (5'-3') | Reverse sequence (5'-3') |
|-------------|----------------|--------------------------|--------------------------|
| BnAPR2      | XM013836995    | TACACGCAACGACTCTTTGG     | GTCCTCAAGAAGTTCCAAAC     |
| BnOASTL     | AY096681       | AAAACCCGGACCTCACAAGA     | GAGTTTCCCGGCATTTTCAG     |
| BnGSH1      | AM265631       | TGAATCAGGGGAAACAAAGC     | TGACTTCAGCACAGGTTTGG     |
| BnGPOX2     | HM130682.1     | TGAGTTTGAGCCAATTCAAAGG   | GGAACTCAGCTTTGAACTTTGT   |
| BnGR1       | AF255651.1     | CTGATTGGTGGGTTTTGCTT     | ACCTTGGCACCATTGTTAGC     |
| BnActin7    | XM013867490    | GATTCCGTTGCCCTGAAGTA     | GCGACCACCTTGATCTTCAT     |

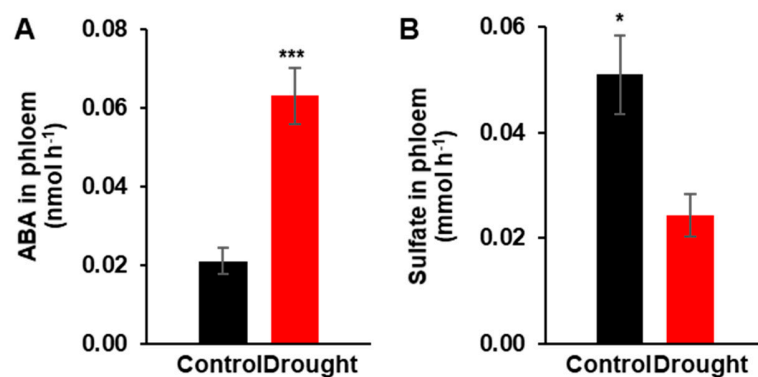

**Supplementary Figure S1.** Changes in concentration of ABA (A) and sulfate (B) in phloem of well-watered (control) or drought-stressed plant at day 14. Data represented as means ± S.E. for n = 4. Asterisks indicate a significant difference compared to the control (water application): \* p < 0.05, \*\*\* p < 0.001.
